# Supplementary material for: Protonolysis of [(iPrO)TiMo5O18]3−: access to a family of TiMo5Lindqvist type polyoxometalates
Source: Royal Society of Chemistry journal article supplement (doi:10.1039/c1dt11256b), 2011-11-18
Supplement: c1dt11256b.pdf [file c1dt11256b.pdf]

## Protonolysis of [ $(^i\text{PrO})\text{TiMo}_5\text{O}_{18}$ ] $^{3-}$ : access to a family of $\text{TiMo}_5$ Lindqvist type polyoxometalates

Laura Coyle, Paul S. Middleton, Christopher J. Murphy, William Clegg, Ross W. Harrington and R. John Errington.\*

### Supplementary Material

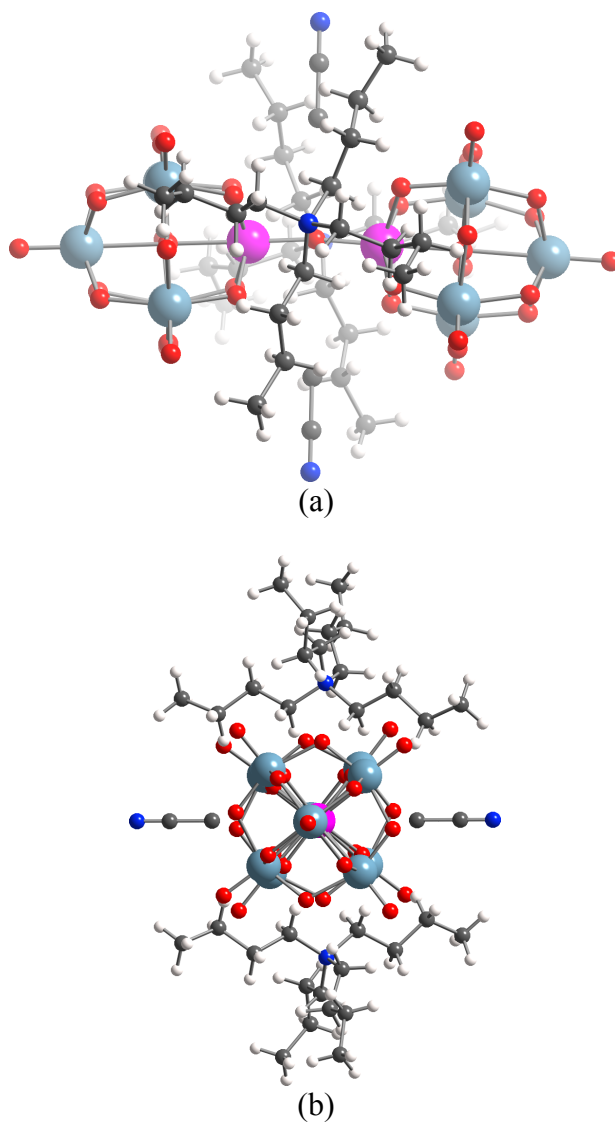

**Figure S1** Views of anion **7** and adjacent TBA cations and MeCN molecules in the structure of  $(\text{TBA})_3[(\mu\text{-O})(\text{TiMo}_5\text{O}_{18})_2]2\text{MeCN}$

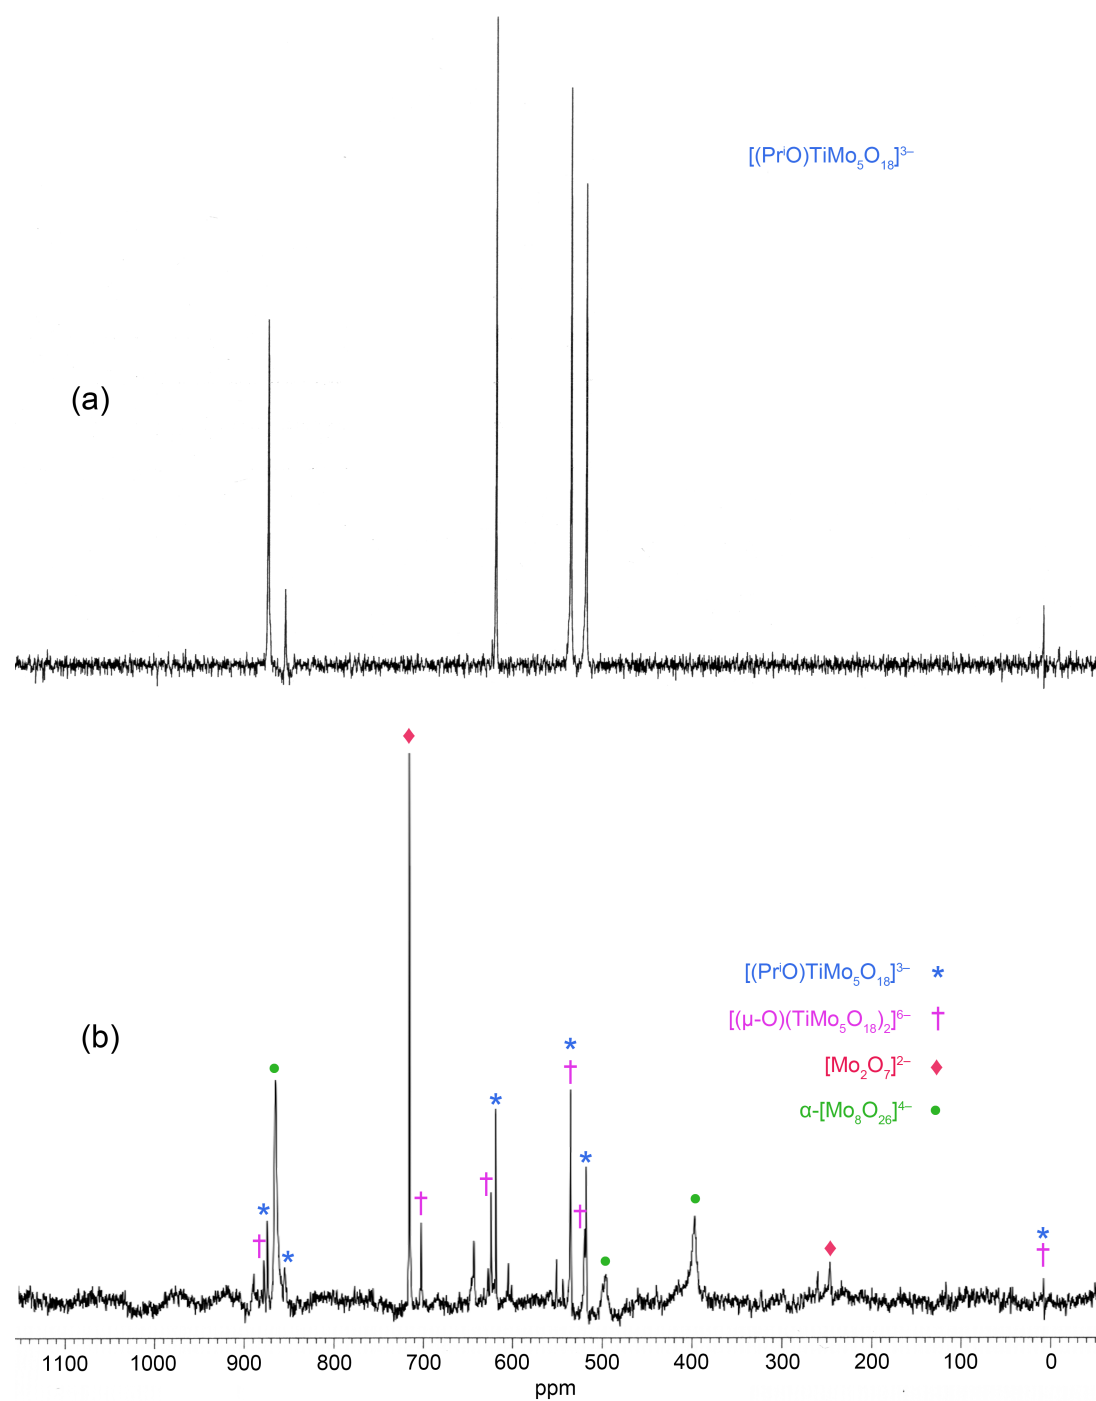

**Fig. S2**  $^{17}\text{O}$  NMR spectra of  $(\text{TBA})_3\mathbf{7}$  before (a) and after (b) heating to  $110\text{ }^\circ\text{C}$  for 16 h.
